# Supplementary material
Source: publisher figshare collection journal article supplement (https://acs.figshare.com/ndownloader/files/5072152)
Supplement: Supplementary file 1 [file 5072152]

## Supporting Informations

Analysis of glycosyl bond cleavage and there related isotope effects in  
collision-induced dissociation quadrupole/time-of-flight mass Spectrometry  
of isomeric trehaloses

Tohru Yamagaki,<sup>\*1</sup> Kazuhiko Fukui,<sup>2</sup> Kazuo Tachibana,<sup>1</sup>

<sup>1</sup>Department of Chemistry, School of Science, University of Tokyo, 7-3-1 Hongo,  
Bunkyo, Tokyo 113-0033 Japan

<sup>2</sup>Computational Biology Research Center (CBRC), National Institute of Advanced  
Industrial Science and Technology (AIST), 2-41-6 Aomi, Koutou, Tokyo 135-0064  
Japan

Corresponding Author:

Tohru Yamagaki, Department of Chemistry, University of Tokyo

E-mail: [yamagaki@chem.s.u-tokyo.ac.jp](mailto:yamagaki@chem.s.u-tokyo.ac.jp)

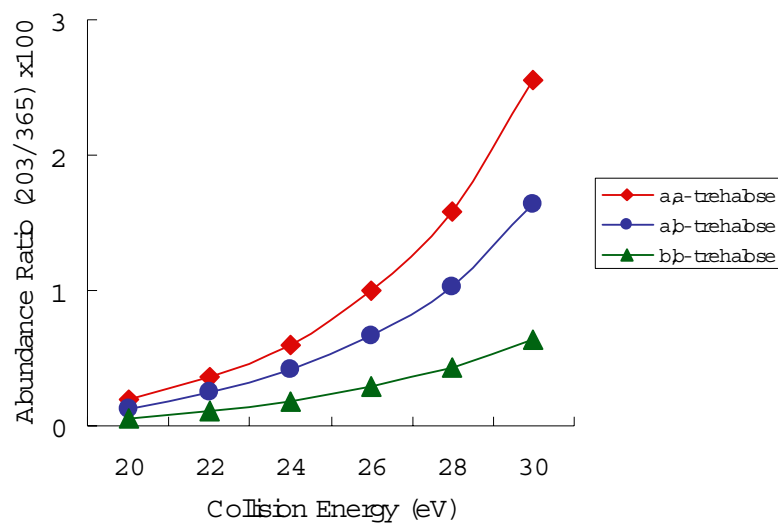

SI-1. Abundance ratio of ion  $m/z$  203/365.

Red diamond plots -♦- are the data of  $\alpha,\alpha$ -trehalose, blue circle plots -●- are that of  $\alpha,\beta$ -trehalose, and green square plots -▲- are that of  $\beta,\beta$ -trehalose.

(a)

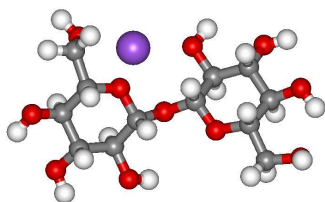

(b)

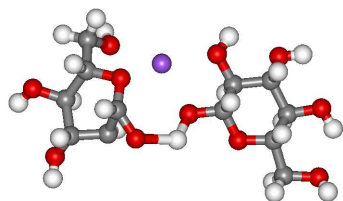

(c)

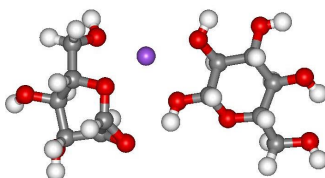

SI-2. Optimized structures of [β,β-trehalose + Na]<sup>+</sup> (a), the transition state (b) and the intermediate (c) product of reaction path (B) in Figure 6-b.

(a)

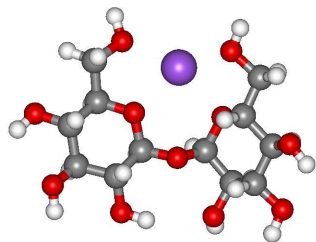

(b)

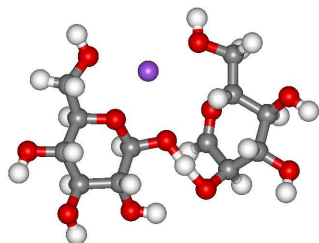

(c)

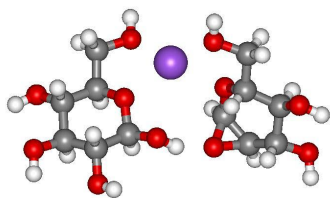

SI-3. Optimized structures of  $[\alpha,\beta\text{-trehalose} + \text{Na}]^+$  (a), the transition state (b) and the intermediate (c) product of reaction path (B) in Figure 6-c.
